# Supplementary material
Source: MDPI journal article supplement (https://www.mdpi.com/2073-4441/13/10/1385)
Supplement: s1 [file s1]

## Supplementary Material

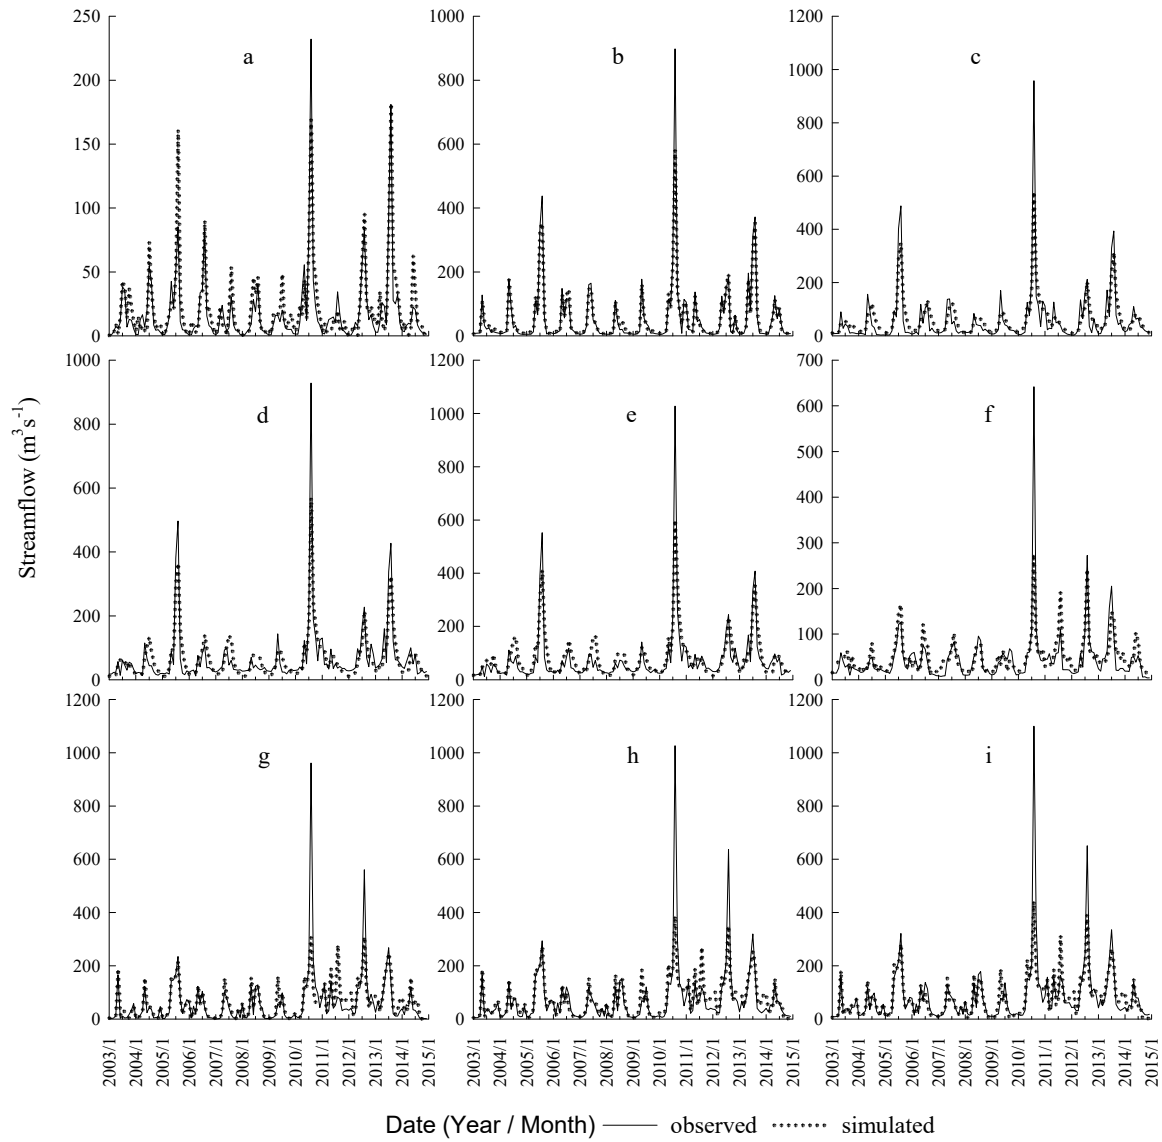

**Figure 1.** Comparison between the observed and simulated monthly streamflow values at nine stations for the calibration period (2001–2010) and validation period (2011–2014). (a) Beikouqian station; (b) Fushun station; (c) Shenyang station; (d) Huanglatuo station; (e) Xingjiawopeng station; (f) Benxi station; (g) Liaoyang station; (h) Xiaolinzi station; and (i) Tangmashai station.

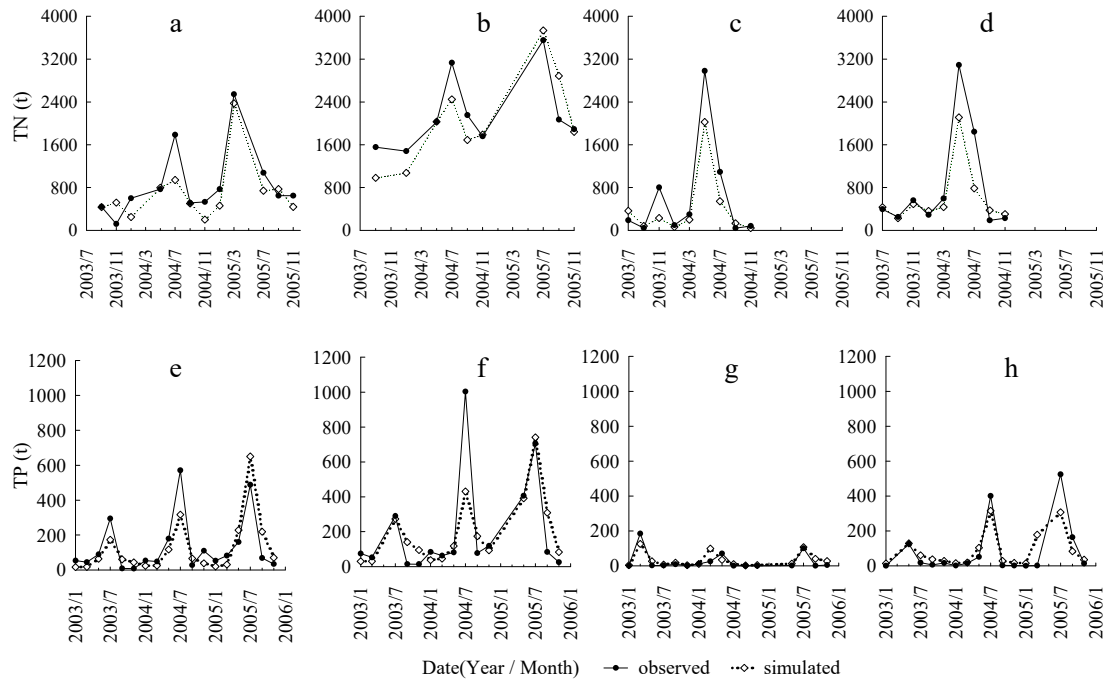

**Figure 2.** Comparison between the observed and simulated monthly nutrient yields at four stations for the calibration period (2003–2004) and validation period (2005). (a) Shenyang station; (b) Xingjiawopeng station; (c) Liaoyang station; (d) Xiaolinzi station; (e) Shenyang station; (f) Xingjiawopeng station; (g) Liaoyang station; (h) Xiaolinzi station.

**Table 1.** Rainfall runoff samples collected from different functional zones of Shenyang city in 2018.

| Functional zones              | 7/8/2018 |         | 8/14/2018 |         | 9/2/2018 |         |
|-------------------------------|----------|---------|-----------|---------|----------|---------|
|                               | Rainfall | Samples | Rainfall  | Samples | Rainfall | Samples |
| Business zone                 | 17.3     | 15      | 8.5       | 7       | 14.5     | 13      |
| Educational zone              | 19.7     | 15      | 14.5      | 18      | 17.5     | 23      |
| High density resiDential zone | 12.4     | 12      | 12.3      | 11      | 21.4     | 19      |
| Industrial zone               | 10.9     | 21      | 8.1       | 12      | 6.6      | 6       |
| Preservation zone             | 18.5     | 21      | 15.4      | -       | 15.5     | 20      |

**Table 2.** Soil and Water Assessment Tool (SWAT) model parameters.

| Data                             | Data format                    | Data description                                                                                                                  | Data source                                                                                                                                                                                            |
|----------------------------------|--------------------------------|-----------------------------------------------------------------------------------------------------------------------------------|--------------------------------------------------------------------------------------------------------------------------------------------------------------------------------------------------------|
| Digital elevation model (DEM)    | Grid (cell size, 30×30 m)      | Elevation                                                                                                                         | Liaoning Surveying and Mapping Bureau                                                                                                                                                                  |
| Soil map and properties          | Grid (cell size, 0.008333333°) | Physical and chemical properties of soils                                                                                         | Harmonized World Soil Database (version 1.2) ( <a href="http://www.fao.org/nr/land/soils/harmonized-world-soil-database/en/">http://www.fao.org/nr/land/soils/harmonized-world-soil-database/en/</a> ) |
| Land use map                     | Grid (cell size, 30×30 m)      | Land use classification in 2015 (Figure 1c)                                                                                       | Landsat 8 Operational Land Imager ( <a href="https://earthexplorer.usgs.gov/">https://earthexplorer.usgs.gov/</a> )                                                                                    |
| Weather                          | Database file (DBF)            | Includes daily data of precipitation, maximum and minimum temperature, humidity and wind speed                                    | China Meteorological Administration ( <a href="https://data.cma.cn/">https://data.cma.cn/</a> ); Local Bureau of Meteorology                                                                           |
| Hydrology and water quality data | Database file (DBF)            | Monthly observed streamflow data, maximum and minimum discharge data of the four reservoirs, and monthly observed nutrient yields | Local hydrographical station and environmental monitoring station                                                                                                                                      |

|                                |                     |                                                                                               |                                                                                                                                           |
|--------------------------------|---------------------|-----------------------------------------------------------------------------------------------|-------------------------------------------------------------------------------------------------------------------------------------------|
| Agricultural management        | Database file (DBF) | Including crop planting time, fertilization, and harvested time                               | Liaoning statistical bureau and field survey                                                                                              |
| Point and nonpoint source data | Database file (DBF) | PS: Urban population and industrial production<br>NPS: Rural population and livestock rearing | Liaoning statistical yearbooks<br>( <a href="http://www.ln.stats.gov.cn/tjsj/sjcx/ndsj/">http://www.ln.stats.gov.cn/tjsj/sjcx/ndsj/</a> ) |

**Table 3.** ENS and R<sup>2</sup> values for the Soil and Water Assessment Tool (SWAT) calibration and validation. "-" means missing observed data in the validation period.

|            | Stations      | Calibration    | Validation |                |      |
|------------|---------------|----------------|------------|----------------|------|
|            |               | R <sup>2</sup> | ENS        | R <sup>2</sup> | ENS  |
| Streamflow | Beikouqian    | 0.80           | 0.77       | 0.88           | 0.87 |
|            | Fushun        | 0.95           | 0.90       | 0.99           | 0.98 |
|            | Shenyang      | 0.86           | 0.77       | 0.80           | 0.78 |
|            | Huanglatuo    | 0.85           | 0.80       | 0.82           | 0.80 |
|            | Xingjiawopeng | 0.82           | 0.77       | 0.78           | 0.78 |
|            | Benxi         | 0.72           | 0.63       | 0.68           | 0.65 |
|            | Laioyang      | 0.64           | 0.58       | 0.67           | 0.64 |
|            | Xiaolinzi     | 0.70           | 0.64       | 0.72           | 0.69 |
|            | Tangmazhai    | 0.73           | 0.66       | 0.76           | 0.74 |
| TN         | Shenyang      | 0.63           | 0.39       | 0.95           | 0.87 |
|            | Xingjiawopeng | 0.76           | 0.36       | 0.78           | 0.58 |
|            | Liaoyang      | 0.94           | 0.78       | -              | -    |
|            | Xiaolinzi     | 0.91           | 0.73       | -              | -    |
| TP         | Shenyang      | 0.92           | 0.66       | 0.91           | 0.61 |
|            | Xingjiawopeng | 0.77           | 0.55       | 0.90           | 0.81 |
|            | Liaoyang      | 0.66           | 0.65       | 0.90           | 0.72 |
|            | Xiaolinzi     | 0.96           | 0.90       | 0.66           | 0.58 |

**Table 4.** Optimal parameters of the hydrological module in the SWMM model.

| Parameters     | Optimal parameters | Parameters       | Optimal parameters |
|----------------|--------------------|------------------|--------------------|
| Width-K        | 4                  | Condit Roughness | 0.012              |
| N-Imperv       | 0.013              | Max. Infl. Rate  | 40                 |
| N-Perv         | 0.15               | Min. Infl. Rate  | 5                  |
| Destore-Imperv | 1                  | Decay Constant   | 7                  |
| Destore-Perv   | 3                  | Drying Time      | 7                  |

**Table 5.** Optimal parameters of the water quality module in the SWMM model.

| Parameters          | TSS   | TN    | TP    | COD   |
|---------------------|-------|-------|-------|-------|
| Road Max Buildup    | 370   | 4     | 0.2   | 96    |
| Road Rate Constant  | 0.5   | 0.7   | 0.1   | 0.2   |
| Road Coefficient    | 0.003 | 0.07  | 0.02  | 0.002 |
| Road Exponent       | 1.9   | 1.7   | 1.8   | 1.8   |
| Roof Max Buildup    | 300   | 2     | 0.14  | 54    |
| Roof Rate Constant  | 0.4   | 0.5   | 0.2   | 0.3   |
| Roof Coefficient    | 0.005 | 0.001 | 0.003 | 0.009 |
| Roof Exponent       | 1.4   | 1.3   | 1.9   | 1.5   |
| Green Max Buildup   | 100   | 9     | 0.4   | 25    |
| Green Rate Constant | 0.3   | 0.5   | 0.3   | 0.1   |
| Green Coefficient   | 0.005 | 0.004 | 0.001 | 0.01  |
| Green Exponent      | 1.6   | 1.2   | 2     | 1.3   |
